# Supplementary material for: Mincle-binding DNA aptamer demonstrates therapeutic potential in a model of inflammatory bowel disease
Source: PubMed Central journal article supplement — Mol Ther Nucleic Acids. 2022 Jun 2;28:935–47. doi: 10.1016/j.omtn.2022.05.026 (PMC9207717; doi:10.1016/j.omtn.2022.05.026), 2022-06-02
Supplement: mmc1.pdf [file mmc1.pdf]

**OMTN, Volume 28**

**Supplemental information**

**Mincle-binding DNA aptamer demonstrates  
therapeutic potential in a model  
of inflammatory bowel disease**

**Matthew Stephens, Keith Keane, Simon Roizes, Shan Liao, and Pierre-Yves von der Weid**

**A**

```

MApT7 -----GG--ATACCGTTGGGGATAATGATTATAACTAGAAATATGCG
MApT1 ---AGTGGGGGGGTA-GCCACTTGATGCGCTAATGATGGTGT-----TG--
MApT4 --CCGCAT-----TTGCCTTTTAACTTACTCCTTATCCTTAC--GT-TGG-
MApT5 CGCAGAAGGGAAACG-GGTTTTTTGTGAATCACGACC----TT-----TG--
MApT6 --CCGTAATGTCGTTTCTCACTTTTTCACTATGTATGGTTCA-----
MApT2 -ACAGGGCTTCACA----CCATTTTTGTTACTGTCCTTTTCTC-----GTG-
MApT3 -----CCCGCATCGTTATCTCTTTGTGCATCTTTCGTCTTTTT-----TGG-
MApT8 -TCGGTGACGGTGGTTATTTGTTTTAAGTTCTTTTGT----TT-----TG--

```

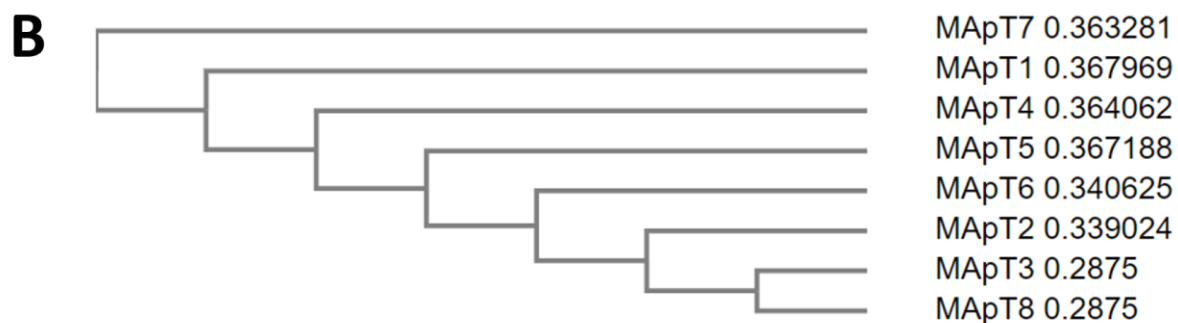

**Supplemental figure 1 – Clustal Omega sequence alignment and family analysis of most abundant anti-Mincle aptamer sequences.** The 8 identified, highly recurrent aptamer sequences within the final round of SELEX are presented. **A)** Their sequence similarity and alignment determined by Clustal Omega. **B)** Their predicted family order delineating sequence similarity across species.

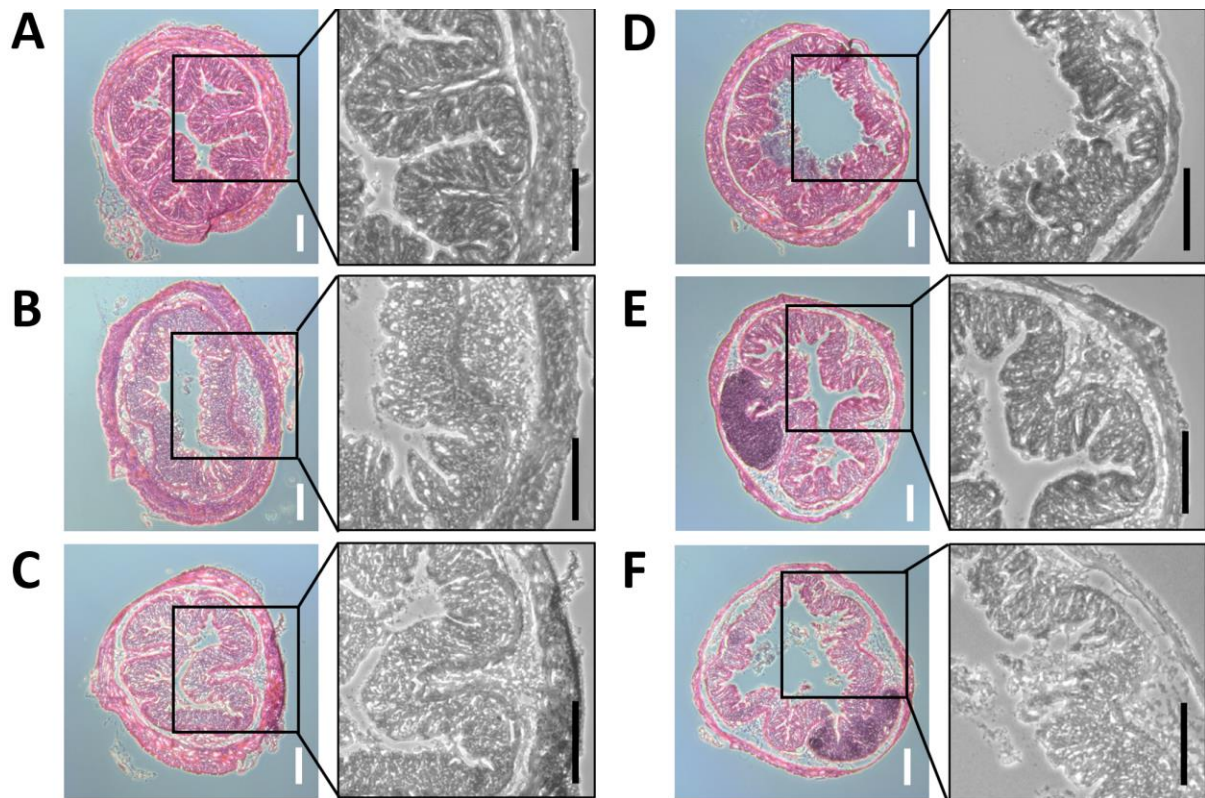

**Supplemental figure 2 – Representative histological H&E section staining on colonic luminal cross-sections of DSS and treated mice.** H&E staining and close ups of 10µM sections of colonic luminal cross sections in **A)** sham treatment (H<sub>2</sub>O), **B)** DSS (2.5% for 7 days), or **C)** DSS + AptMincle<sup>DRBL</sup> **D)** DSS + AptMincle<sup>CORE</sup> **E)** DSS + AptMincle<sup>PORT</sup> **F)** DSS + AptMincle<sup>RND</sup> (2.5% DSS + 3.5mg/kg AptMincle given I.P. on day 3). Scale bar = 50µm.

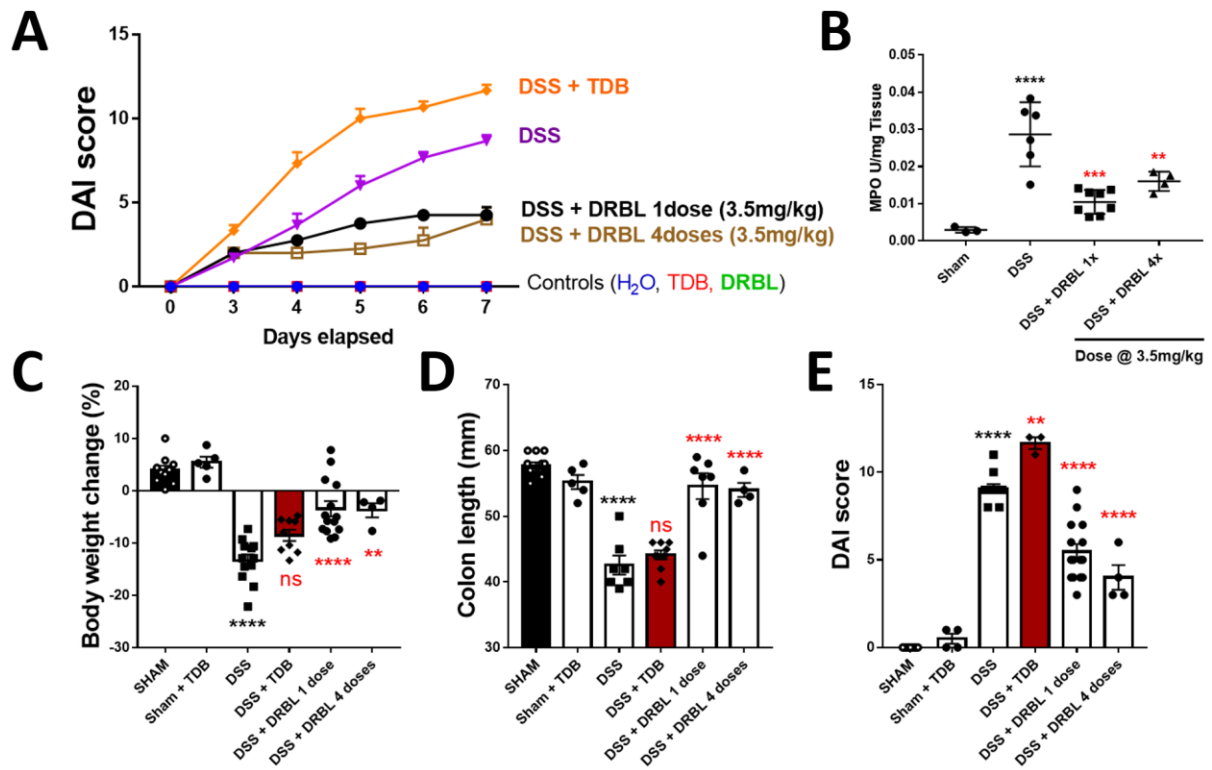

**Supplemental Figure 3: TDB exacerbates DSS-colitis phenotype and repeated doses of AptMincle<sup>DRBL</sup> does not improve therapeutic terminal outcome in DSS mice compared with a single-dose. A)** Disease activity index scoring (DAI) is not significantly improved by repeated dosage of AptMincle<sup>DRBL</sup> (DSS + DRBL 1dose/4dose) but is worsened significantly by addition of TDB gavage (1mg/kg). **B)** MPO activity of AptMincle DSS mice does not improve with repeated doses. **C-D)** Body weight change of DSS mice with TDB is not significantly altered by TDB co-administration nor repeated doses of AptMincle<sup>DRBL</sup>. **E)** Terminal disease activity score is worsened by TDB co-administration with DSS treatment. Anova with Sidaks posthoc test \*\* $P < 0.01$ , \*\*\* $P < 0.001$ , \*\*\*\* $P < 0.0001$ . Black stars represent significance from Sham controls while red stars indicate significance against DSS groups. n=4-12.
